# Supplementary material for: Synergy between Phage Sb-1 and Oxacillin against Methicillin-Resistant Staphylococcus aureus
Source: MDPI journal article supplement (doi:10.3390/antibiotics10070849), 2021-07-13
Supplement: s1 [file s1]

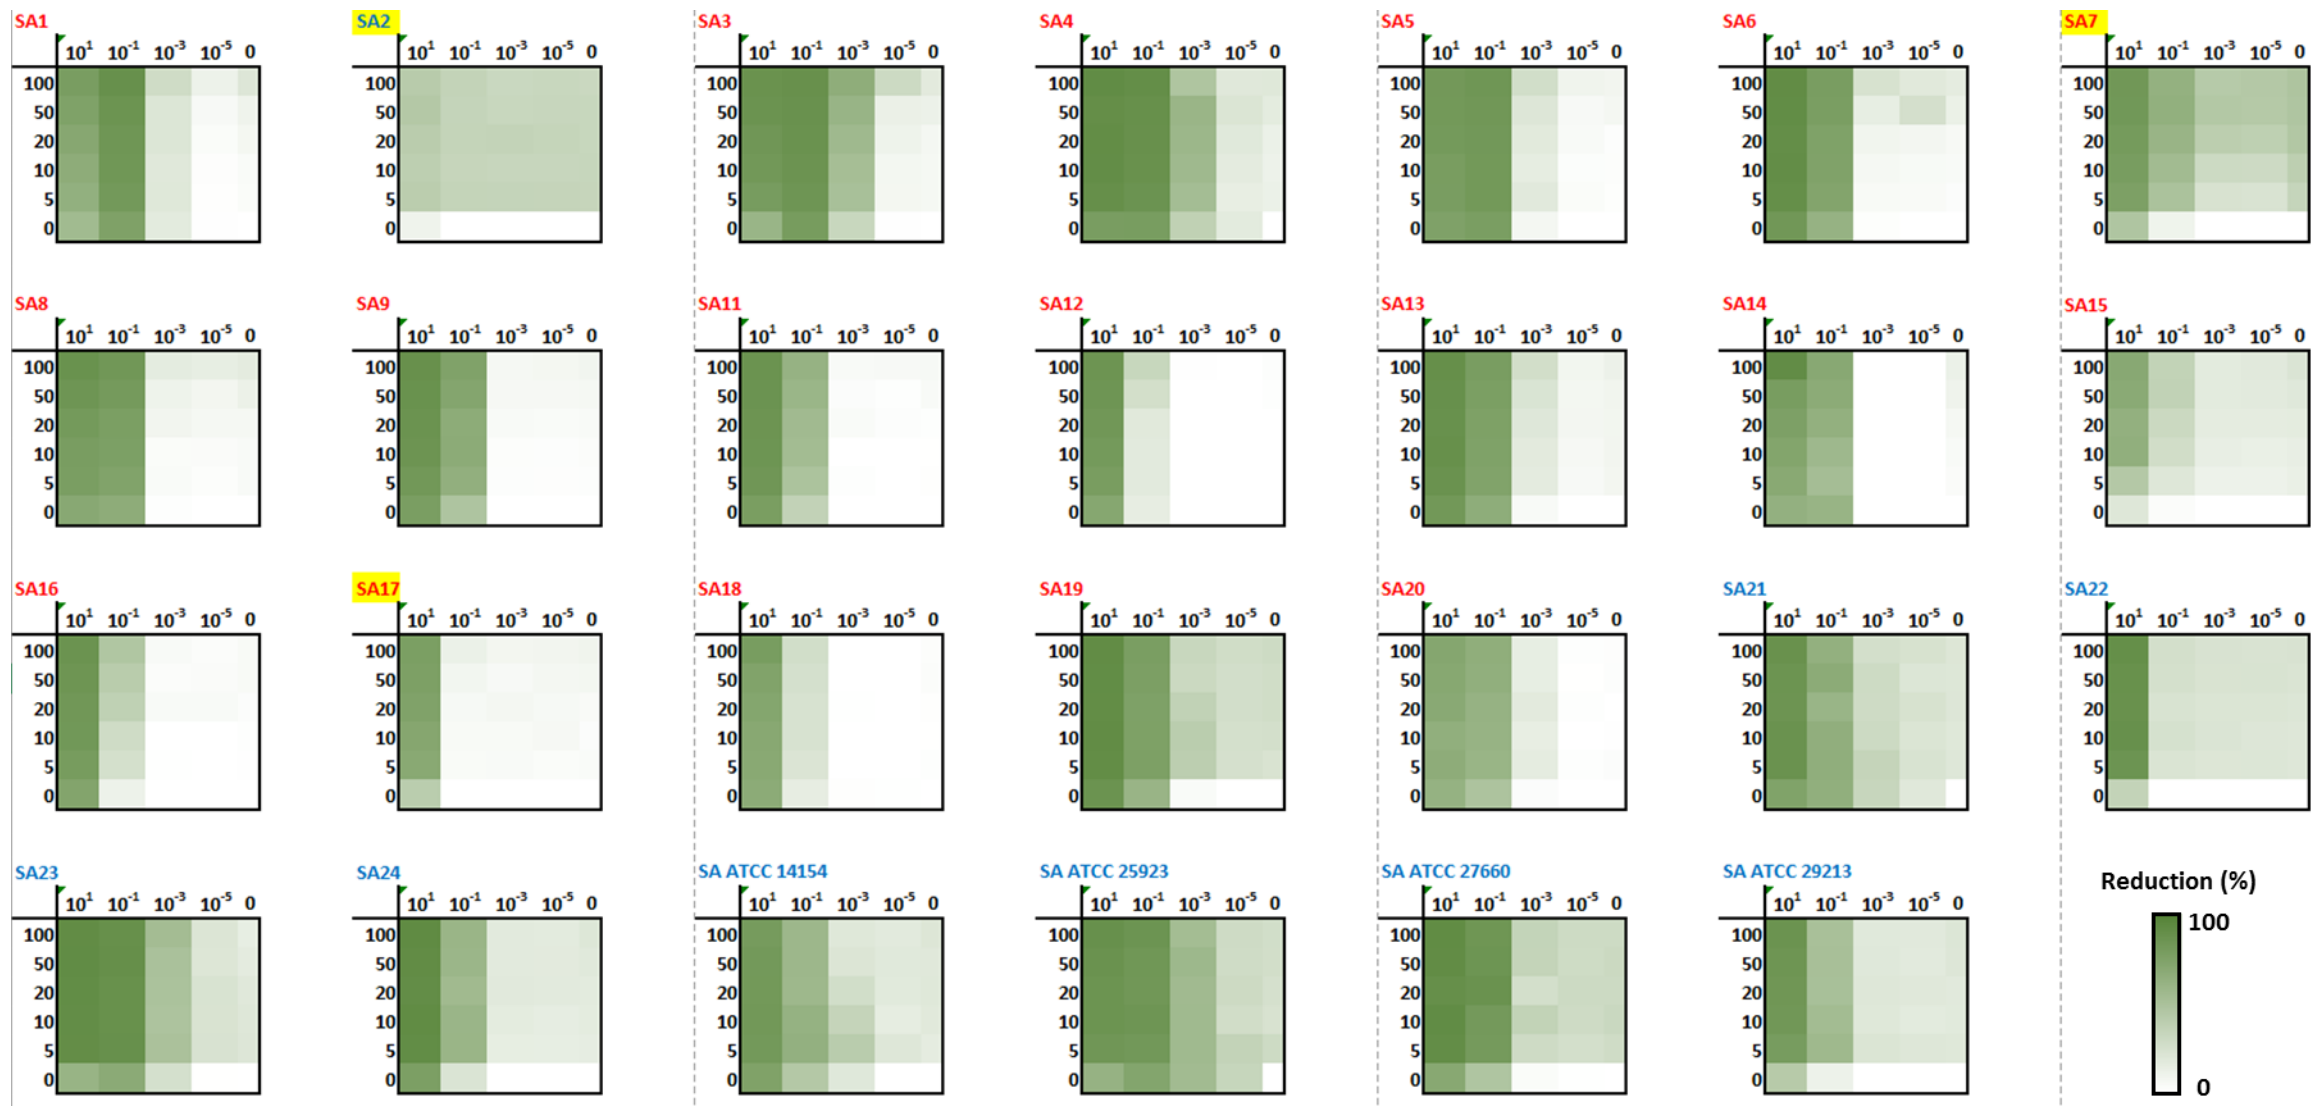

Figure S2: Heatmap displaying the level of bacterial reduction based on combination assays with varying dosages of phage Sb-1 (MOI 0,  $10^{-5}$ ,  $10^{-3}$ ,  $10^{-1}$ , 10, horizontal axis) and oxacillin (0, 5, 10, 20, 50, and 100 µg/ml, vertical axis) against 27 *S. aureus* isolates SA1 to SA24 (SA10 not included) plus four ATCC strains. Red: MRSA, Blue: MSSA, Yellow: Phage-resistant isolates (all other isolates are phage sensitive)
