# Supplementary material for: Synergy between Phage Sb-1 and Oxacillin against Methicillin-Resistant Staphylococcus aureus
Source: MDPI journal article supplement (doi:10.3390/antibiotics10070849), 2021-07-13
Supplement: s1 [file s1]

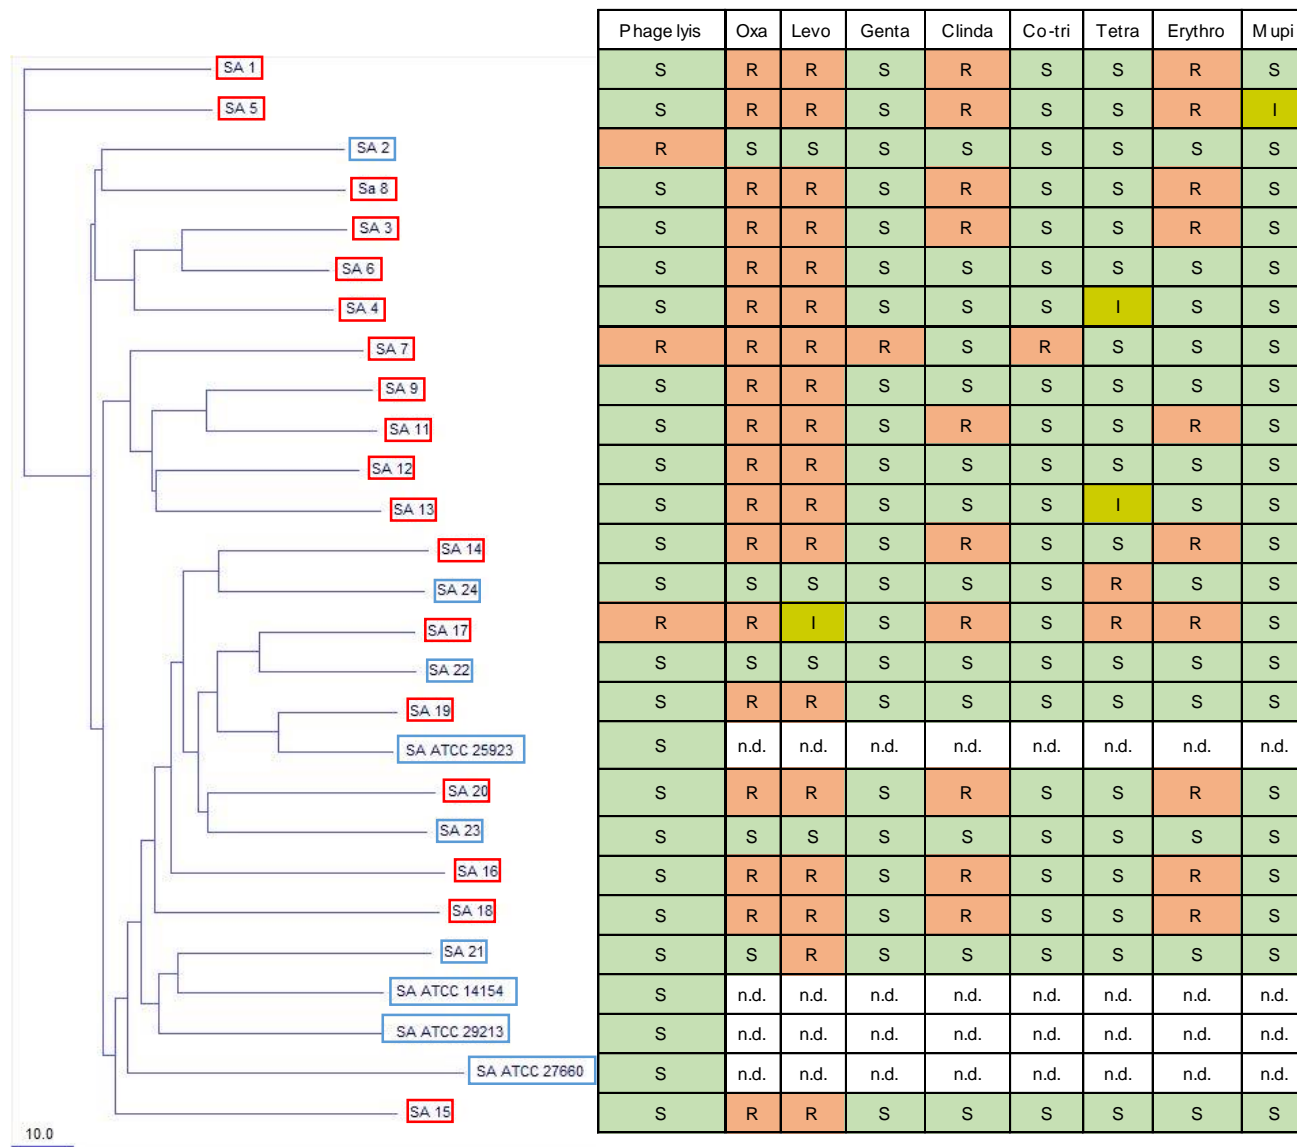

Fig. S1 Neighbor-joining dendrogram resulting from ERIC-PCR for 27 *S. aureus* isolates: 18 clinical MRSA (red rectangle), 5 clinical MSSA, and four ATCC reference MSSA strains (blue rectangle) in conjunction to the susceptibility to phage Sb-1 along with antibiotic resistance profiles. Oxa: Oxacillin; Levo: Levofloxacin; Genta: Gentamicin; Clinda: Clindamycin; Co-tri: Trimethoprim/sulfamethoxazole; Tetra: Tetracycline; Erythro: Erythromycin; Mupi: Mupirocin; R = resistant, I = intermediate, S = sensitive, n.d.: not determined;
