# Supplementary material for: Synergy between Phage Sb-1 and Oxacillin against Methicillin-Resistant Staphylococcus aureus
Source: Antibiotics (Basel). 2021 Jul 13;10(7):849. doi: 10.3390/antibiotics10070849 (PMC8300854; doi:10.3390/antibiotics10070849)
Supplement: Supplementary file 1 [file antibiotics-10-00849-s001.zip]

Archive with 4 entries (4 files):
- FigureS1.pdf
- FigureS2.pdf
- FigureS3.pdf
- Supplemental_Information_Methods.pdf
